# Supplementary material
Source: Springer Nature journal article supplement (https://www.springermedizin.de/resource/supplementary/12911_2013_794_MOESM4_ESM.pdf/9526654)
Supplement: MOESM4 [file 9526654]

**Record *a* is added to the system**

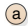

1/02/2012

**Records *b* and *c* are added to the system, which link with record *a***

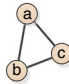

1/03/2012

**Record *c* is deleted from the system**

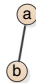

1/04/2012

**Record *d* is added to the system, which links with record *b***

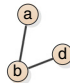

1/06/2012

**Group is manually reviewed, *d* is split from records *a* and *b***

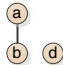

1/07/2012

1/01/2012

1/08/2012
